# Supplementary material
Source: PubMed Central journal article supplement (PMC3191003)
Supplement: supp_M111.236802_jbc.M111.236802-1.pdf [file supp_M111.236802_jbc.M111.236802-1.pdf]

## SUPPLEMENTAL METHODS

*Morphological analysis by scanning electron microscopy (SEM)* ---Glutaraldehyde (2%) and paraformaldehyde (2%)-fixed inner ears were microdissected, stepwise dehydrated in ethanol solutions, and eventually freeze-dried in *t*-butyl alcohol. Prepared inner ears were then mounted on aluminum stubs with colloidal silver adhesive and sputter-coated with gold palladium before imaging in a Hitachi S-800s scanning electron microscope.

*Endocochlear potential*---Endocochlear potentials from WT, *Ednrb*(-/-)-mice and *Ednrb*(-/-);*DBH-Ednrb*-mice were recorded with a dual electrometer (FD-223; WPI) against an Ag/AgCl reference inserted under the skin, and they were monitored with a Mac Lab 8s (ADInstruments) (1).

*TUNEL staining*---Terminal deoxynucleotidyl transferase-mediated dUTP nick-end labeling (TUNEL) with 4% paraformaldehyde fixative solution was performed following the instructions of the manufacturer (Chemicon) with a previously reported positive control of hair bulge cells (2).

## REFERENCES

1. Komune, S., Nakagawa, T., Hisashi, K., Kimitsuki, T., and Uemura, T. (1993) *Hear. Res.* **70**, 197-204
2. Ito, M., Kizawa, K., Toyoda, M., and Morohashi, M. (2002) *J. Invest. Dermatol.* **119**, 1310-1316
3. Nishimura, E. K., Jordan, S. A., Oshima, H., Yoshida, H., Osawa, M., Moriyama, M., Jackson, I. J., Barrandonk, Y., Miyachi, Y., and Nishikawa, S.-I. (2002) *Nature* **416**, 854-860
4. Amiel, J., Attié, T., Jan, D., Pelet, A., Edery, P., Bidaud, C., Lacombe, D., Tam, P., Simeoni, J., Flori, E., Nihoul-Fékété, C., Munnich, A., and Lyonnet, S. (1996) *Hum. Mol. Genet.* **5**, 355-357
5. Svensson, P.-J., Anvret, M., Molander, M.-L., and Nordenskjöld, A. (1998) *Hum. Genet.* **103**, 145-148
6. Hofstra, R. M., Osinga, J., and Buys, C. H. (1997) *Eur. J. Hum. Genet.* **5**, 180-185
7. Attié, T., Till, M., Pelet, A., Amiel, J., Edery, P., Boutrand, L., Munnich, A., and Lyonnet, S. (1995) *Hum. Mol. Genet.* **4**, 2407-2409
8. Boardman, J. P., Syrris, P., Holder, S. E., Robertson, N. J., Carter, N., and Lakhoo, K. (2001) *J. Med. Genet.* **38**, 646-647
9. Sangkhathat, S., Chiengkriwate, P., Kusafuka, T., Patrapinyokul, S., and Fukuzawa, M. (2005) *Pediatr. Surg. Int.* **21**, 960-963
10. Gross, A., Kunze, J., Maier, R. F., Stoltenburg-Didinger, G., Grimmer, I., and Obladen, M. (1995) *Am. J. Med. Genet.* **56**, 322-326
11. Verheij, J. B., Kunze, J., Osinga, J., van Essen, A. J., and Hofstra, R. M. W. (2002) *Am. J. Med. Genet.* **108**, 223-225
12. Syrris, P., Carter, N. D., and Patton, M. A. (1999) *Am. J. Med. Genet.* **87**, 69-71
13. Kusafuka, T., Wang, Y., and Puri, P. (1996) *Hum. Mol. Genet.* **5**, 347-349

14. Puffenberger, E. G., Hosoda, K., Washington, S. S., Nakao, K., deWit, D., Yanagisawa, M., and Chakravarti, A. (1994) *Cell* **79**, 1257-1266
15. Auricchio, A., Griseri, P., Carpentieri, M. L., Betsos, N., Staiano, A., Tozzi, A., Priolo, M., Thompson, H., Bocciardi, R., Romeo, G., Ballabio, A., and Ceccherini, I. (1999) *Am. J. Med. Genet.* **64**, 1216-1221
16. Auricchio, A., Casari, G., Staiano, A., and Ballabio, A. (1996) *Hum. Mol. Genet.* **5**, 351-354

## SUPPLEMENTAL FIGURE LEGENDS

**Fig. S1. Immunohistochemistry of EdnrB in hair cells of WT, *EdnrB*(-/-) and *EdnrB*(-/-);*DBH-EdnrB*-mice.** The organs of Corti from WT (A), *EdnrB*(-/-) (B) and *EdnrB*(-/-);*DBH-EdnrB*-mice (C) on P19 were immunohistochemically analyzed with anti-EdnrB antibody. No signals were detected at the organ of Corti from *EdnrB*(-/-), *EdnrB*(-/-); *DBH-EdnrB* and littermate WT-mice on P19 (A-C). Scale bars: 50  $\mu$ m.

**Fig. S2. Morphological analyses of hair cells from WT, *EdnrB*(-/-) and *EdnrB*(-/-);*DBH-EdnrB*-mice on P17.** Scanning electron microscopy showed no morphological differences in inner hair cells (IHC) and outer hair cells (OHC) at equivalent positions between *EdnrB*(-/-) (B), *EdnrB*(-/-);*DBH-EdnrB* (C) and littermate WT-mice (A). Magnified figures of IHC and OHC in A-C are shown in D-F and in G-I, respectively. Scale bars: 10  $\mu$ m (A-C), 3  $\mu$ m (D-I).

**Fig. S3. Apoptotic signals in SGNs.** A-C, SGNs from *EdnrB*(-/-) (B), *EdnrB*(-/-);*DBH-EdnrB* (C) and littermate WT-mice (A) on P19 were stained by the TUNEL method. D-F, the corresponding views were visualized under a phase contrast microscope. No apoptotic signals were detected at SGNs from *EdnrB*(-/-), *EdnrB*(-/-);*DBH-EdnrB* and littermate WT-mice on P19. Scale bars: 10  $\mu$ m.

**Fig. S4. Measurement of endocochlear potentials.** Endocochlear potentials from 10-week-old WT (n = 5) and *EdnrB*(-/-);*DBH-EdnrB*-mice (n = 5) were recorded. \*\*,  $P < 0.01$  (Mann-Whitney *U*-test).

**Fig. S5. Hair color of WT, *EdnrB*(-/-), *EdnrB*(-/-);*DBH-EdnrB*-mice on P28.** A, WT, *EdnrB*(-/-) and *EdnrB*(-/-);*DBH-EdnrB*-mice on P28. Coat color is indistinguishable between *EdnrB*(-/-) and *EdnrB*(-/-);*DBH-EdnrB*-mice. Scale bar: 1 cm. B, *Dct-LacZ* staining of the skin (3). LacZ-positive cells in WT-mice indicate melanocytes in the hair follicles (arrows). Follicular melanocytes are absent in *EdnrB*(-/-) and *EdnrB*(-/-);*DBH-EdnrB*-mice. Scale bar: 100  $\mu$ m.

**Fig. S6. Suprathreshold ABR analysis in *EdnrB*(-/-);*DBH-EdnrB*-mice and littermate WT-mice on P10, P14 and P19.** The amplitude versus sound level relationship (means  $\pm$  SE) of the 12 kHz wave I obtained during ABR analysis of *EdnrB*(-/-);*DBH-EdnrB*-mice (red diamonds, n = 6) and littermate WT-mice (black squares, n = 6) on P10 (A), P14 (B) and P19 (C) was plotted. The slope of amplitude growth was similar in of *EdnrB*(-/-);*DBH-EdnrB*-mice and WT-mice on P14 and P19.

**Fig. S7. Genome structure of *EdnrB* mutant mice and summary of human *EDNRB* gene mutations.** A, Schema of genomic structure of wild type (WT), spotting lethal (*sl*), Waardenburg-Shah syndrome IV (*WS-IV*) and *EdnrB*(-/-)-mice [*EdnrB*(-/-)]. *sl* mice have spontaneous deletions of exon 1 and intron 1, while *WS-IV* mice have spontaneous deletions of exon 2 and exon 3. *EdnrB*(-/-)-mice analyzed in this study have a deletion of exon 3. The hearing levels of *EdnrB*(-/-)-mice have not been reported. B, Summary of point mutations in

human *EDNRB* gene causing WS or Hirschsprung disease (Hirsch). ABCD: albinism, black locks, cell migration disorder of neurocytes of the gut and deafness. (ter): termination. Human patients with WS caused by point mutations in exon 3 of *EDNRB* have been reported to suffer from deafness (10-12).

Fig. S1

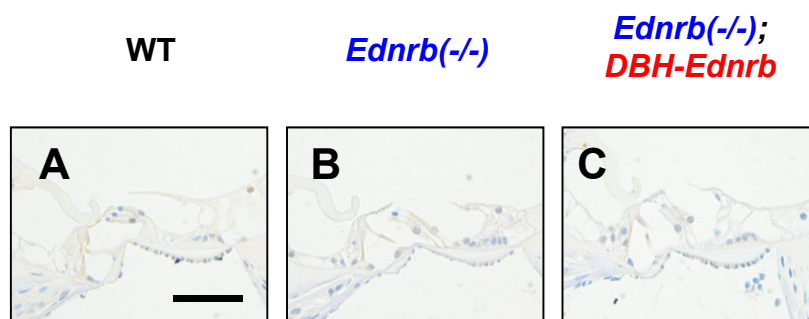

Fig. S2

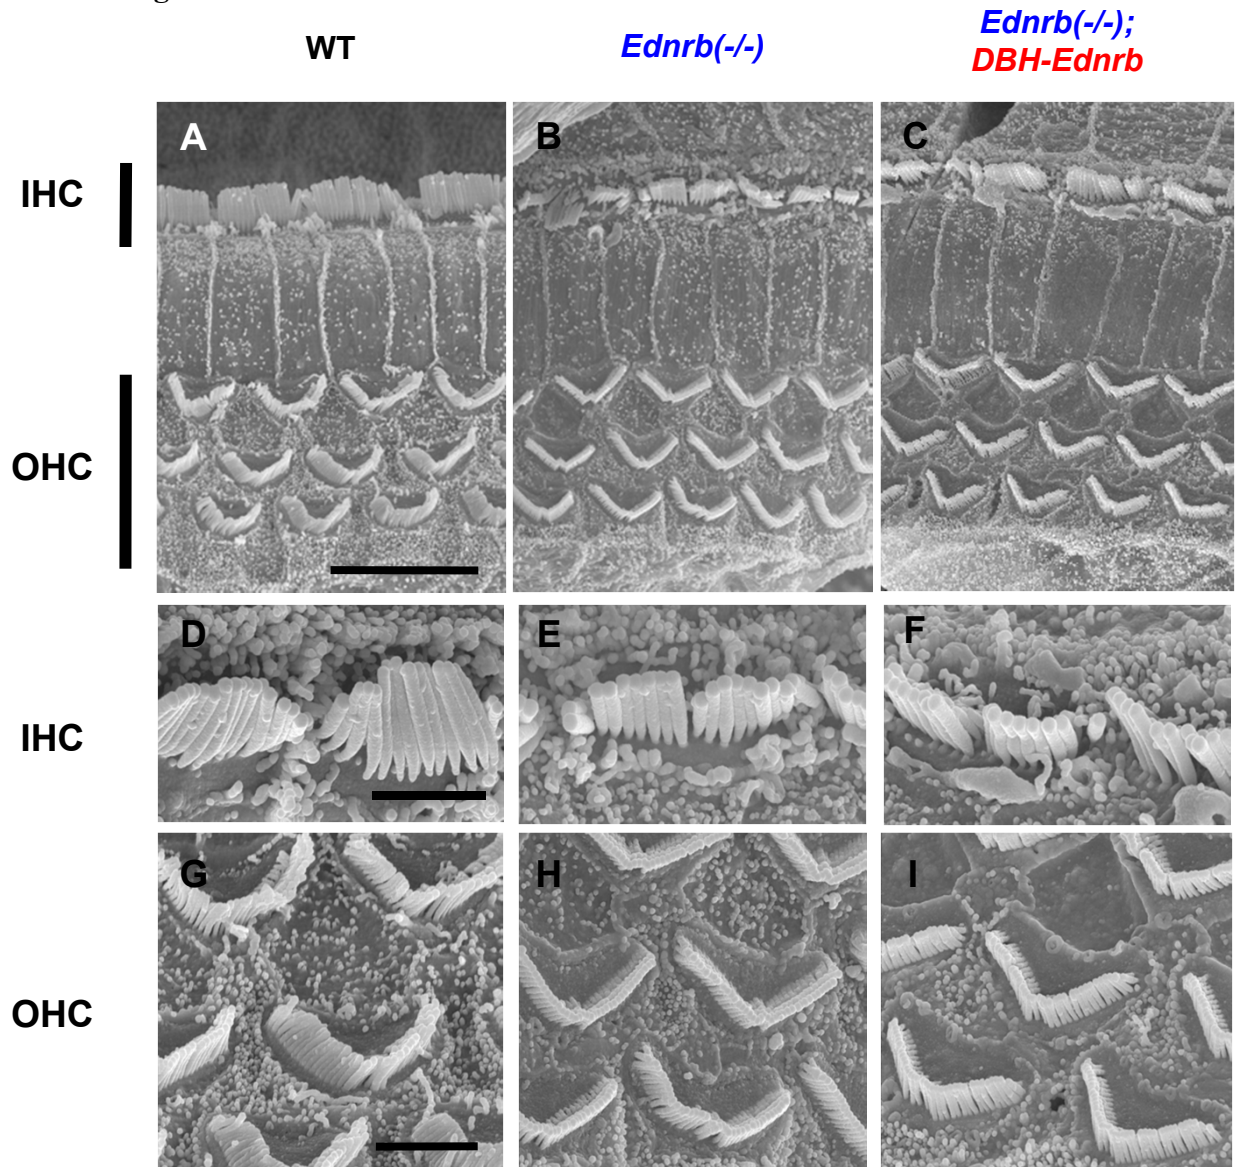

Fig. S3

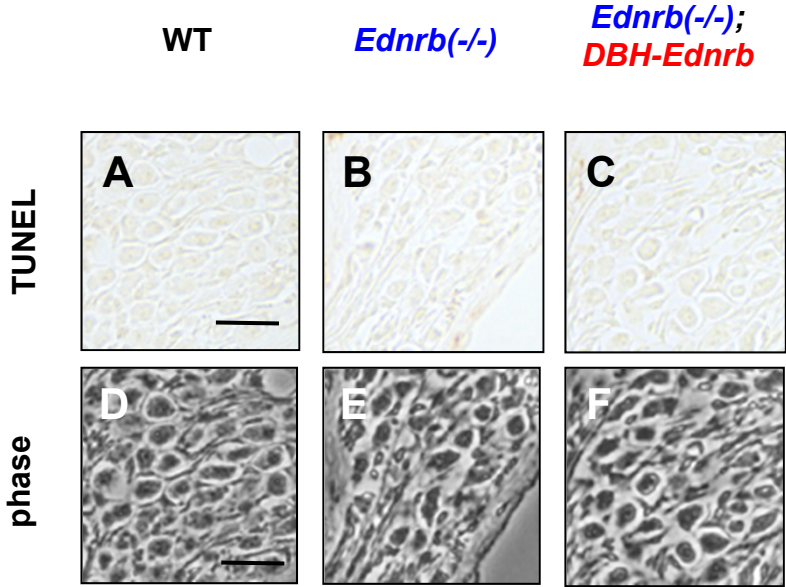

Fig. S4

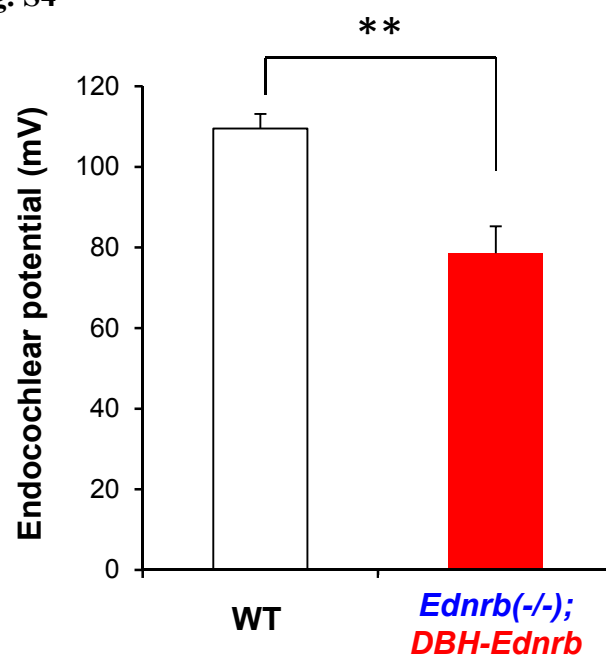



Fig. S5

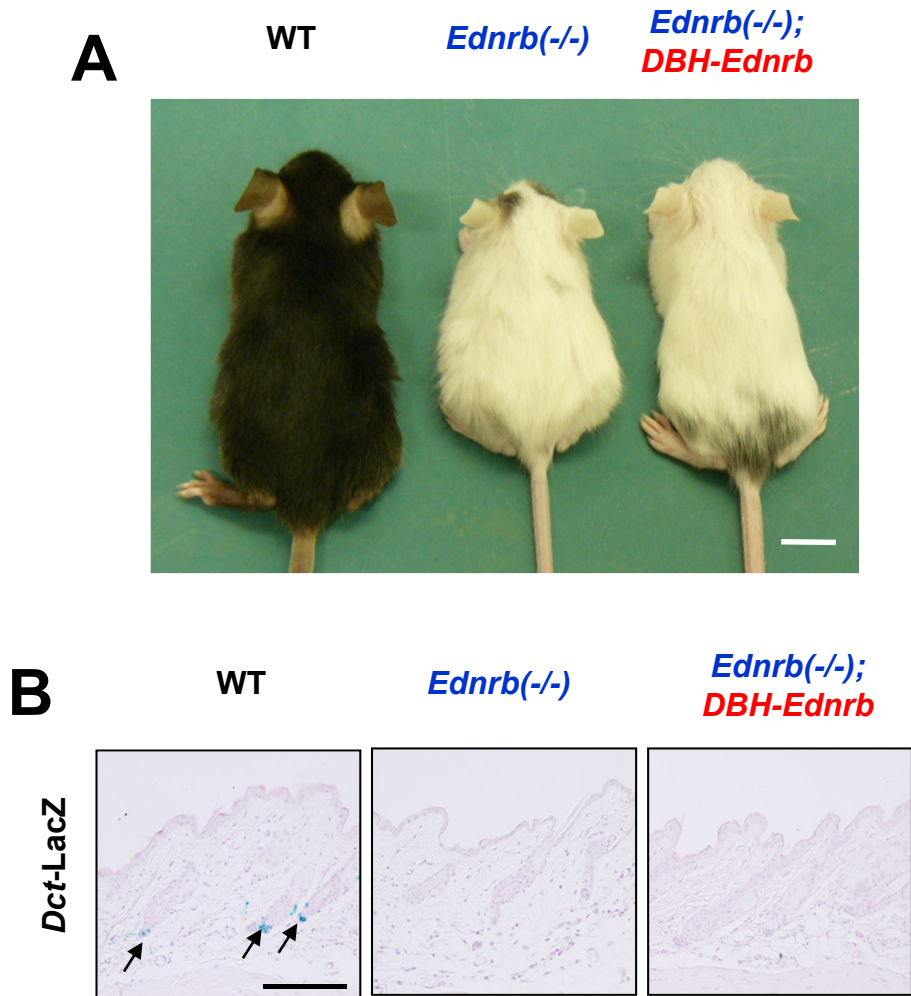

Fig. S6

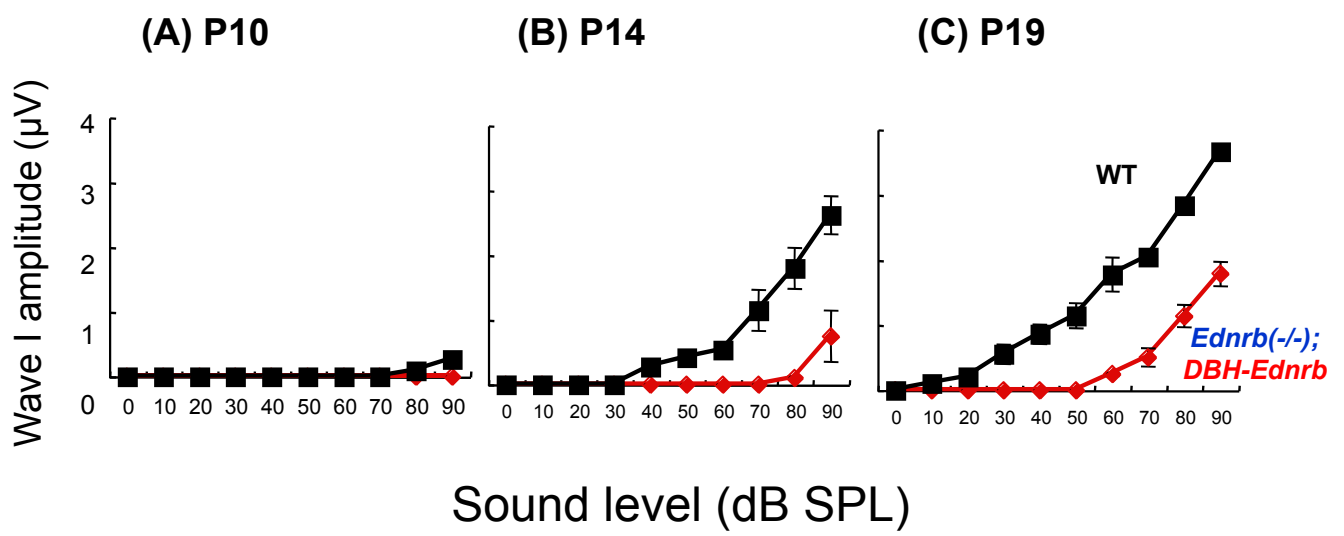

Fig. S7

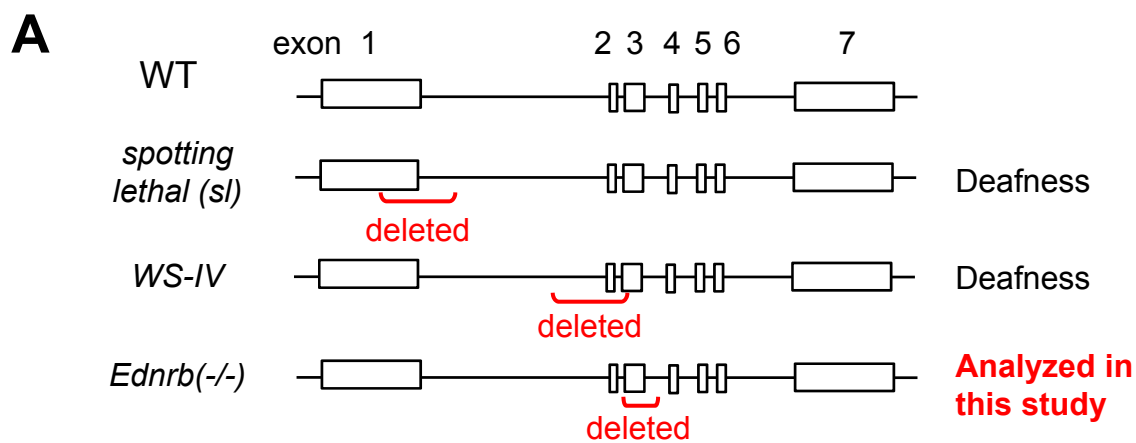

**B**

| disorder | deafness           | exon     | amino acid change | nucleotide change | mutation            | reference |
|----------|--------------------|----------|-------------------|-------------------|---------------------|-----------|
| Hirsch   |                    | 1        | (5'UTR)           | G -> A            | transversion hetero | 4         |
| Hirsch   |                    | 1        | G57S              | GGT -> AGT        | missense            | 5,6       |
| WS       |                    | 2        | A183G             | C -> G            | missense            | 7         |
| WS       | deafness           | 2        | G186R             | GGA -> AGA        | missense            | 8         |
| WS       | deafness           | 2        | S196N             | AGT -> AAT        | missense            | 9         |
| ABCD(WS) | bilateral deafness | <b>3</b> | R201(ter)         | C -> T            | nonsense            | 10,11     |
| WS       | deafness           | <b>3</b> | R253(ter)         | CGA -> TGA        | nonsense            | 12        |
| Hirsch   |                    | 4        | W275(ter)         | G -> A            | nonsense            | 13        |
| Hirsch   | deafness           | 4        | W276C             | G -> T            | missense            | 14        |
| Hirsch   |                    | 4        | (894ter)          | insert T          | frameshift          | 13        |
| Hirsch   |                    | 4        | S305N             | G -> A            | missense            | 15        |
| Hirsch   |                    | 5        | R319W             | GGG -> TGG        | missense hetero     | 4         |
| Hirsch   |                    | 6        | N378I             | deletion A        | frameshift          | 16        |
| Hirsch   |                    | 6        | P383L             | CCA -> CTA        | missense hetero     | 4         |
